# Supplementary material
Source: PubMed Central journal article supplement (PMC4297321)
Supplement: NIHMS642196-supplement-01.pdf [file NIHMS642196-supplement-01.pdf]

## 1 SUPPLEMENTAL MATERIAL

### 2 **Methods**

#### 3 **Cell culture, viral transductions and antibiotic selection**

4 c-kit+ CPCs isolated from 3 and 13 month old male FVB mice hearts (1,2), human patients receiving left ventricular assist  
5 device (3,4), aborted human fetuses (4) were cultured as described previously. Mouse CPCs (mCPCs) and human CPCs  
6 (hCPCs) were cultured for at least 8 and 3 passages respectively to obtain sufficient cells for experiments. Experiments  
7 on mCPCs and hCPCs were conducted between passages 8-20 and 4-10 respectively. mCPCs demonstrate no  
8 significant change in molecular or morphological characteristics between passages. However hCPCs demonstrate  
9 differences consistent of replicative senescence and therefore passages 4-5 were classified as early passages, 6-8 as  
10 mid passages, 9-10 as late passages (4).

11 Lentiviral constructs harboring sh-RNA against p53 (clone ID: TRCN0000003753, TRCN0000012359), c-Myc  
12 (TRCN0000234923, TRCN0000039641), Pim-1 (TRCN0000010116) were purchased from Sigma Aldrich. Lentiviral  
13 constructs for Tetracycline – inducible c-Myc and pLVX-Tet-on were purchased from Addgene (Plasmid 20723, FUW-  
14 tetO-hMYC) and Clontech respectively. Lentiviruses were prepared and concentrated as described previously (5). Lt-sh-  
15 NS (5), Lt-sh-control (5), lentivirus overexpressing Pim-1 and GFP (2), GFP (2), NS-GFP (5), AzG-Geminin and mKO-  
16 Cdt1 (6) have been previously described. mCPCs were transduced with lentiviruses and after 48 hours were treated with  
17 puromycin (1-10 µg/ml, overnight) or neomycin/G418 (for pLVX-Tet-on, 400 µg/ml, overnight), with the exception of CPCs  
18 that were transduced with viruses harboring a fluorescent protein like GFP/AzG/mKO, in which case the cells were FACS  
19 sorted based on expression of fluorescence marker. hCPCs were transduced as described previously (3). Following Lt-sh-  
20 NS transduction, CPCs were observed for 3-4 days and samples were collected after detecting morphological changes.  
21 For dual knockdown experiments, CPCs were transduced with Lt-sh-p53 prior to NS knockdown.

#### 22 **Pharmacological inhibitors**

23 Pharmacological inhibition of c-Myc was achieved by treatment with 10058-F4 (c-Myc in, 50µM, overnight; Sigma Aldrich,  
24 #F3680) as has been described before (1,7).

#### 25 **Human Myocardium**

26 Non-failing human myocardium was obtained from donors whose hearts were declined for transplantation. Institutional  
27 Review Board-approved prospective informed consent for research use of non-failing hearts through Temple University

1 School of Medicine and the local organ procurement organization (Gift of Life, Inc) ensured ethical use of all tissue.  
2 Myocardial perfusion with cold, 4:1 blood cardioplegia and prompt transport to the laboratory was performed as previously  
3 described (8). Tissue pieces were snap-frozen in liquid nitrogen and stored at -80C until time of analysis. The cardiac  
4 region from non-failing human hearts included the mid left ventricle free wall with full thickness from epicardium to  
5 endocardium. Human fetal and adult failing myocardium were obtained as previously described (4). Adult failing heart  
6 samples were small explants of the left ventricle isolated from patients with end stage heart failure receiving a left  
7 ventricular assist device and the tissue was used either for isolation of adult human CPCs (AhCPCs) or for biochemical  
8 analyses. Fetal whole heart tissue from spontaneously aborted fetuses at 16-17 weeks of age was used for isolation of  
9 fetal human CPCs (FhCPCs) or for biochemical analyses. Each sample was isolated from a different patient and tissue  
10 from individual patients was not combined. Experimental values obtained from multiple patients of a sample category  
11 (fetal, adult failing, adult non-failing) were averaged for statistical analyses. Human patient information and disease state  
12 of samples used have been listed in Supplemental Table 2.

### 13 **Sample preparation and immunoblot analyses**

14 Protein lysates from cultured cells were prepared using sample buffer (containing 150mM Tris (pH 6.8), 150mg/ml  
15 sucrose, 2mM ethylene diamine tetraaceticacid (EDTA) (pH 7.5-8), 480mg/ml urea, 8mg/ml dithiothreitol, 0.2% sodium  
16 dodecyl sulfate, 0.2 mg/ml bromophenol blue at a final pH of 6.8, supplemented with protease and phosphatase inhibitor  
17 cocktails, Sigma-Aldrich #P8340, #P5726, #P0044). For detection of some proteins (p53, c-Myc) samples were extracted  
18 on dry ice and ethanol instead of on ice. Samples from mice left ventricles and human myocardium were prepared by  
19 homogenizing tissue in isolation buffer (containing 70 mM sucrose, 190 mM mannitol, 20mM HEPES solution, and 0.2  
20 mM EDTA in de-ionized water) using a Next Advance bullet blender. Protein lysates were prepared from homogenized  
21 tissue by adding sample buffer in a 1:1 ratio. Samples were boiled for 5 minutes at 100°C to denature proteins.  
22 Immunoblotting was done as described before (5). Antibodies used are listed in Supplemental Table 3. Blots were  
23 quantified using ImageJ (NIH).

### 24 **RNA extraction and quantitative real time PCR**

25 Total RNA was extracted using TRIzol (Invitrogen). cDNA was synthesized using iScript cDNA synthesis kit (Bio-Rad).  
26 Real time PCR was performed on all samples in triplicate using iQ SYBR Green (Bio-Rad) following the manufacturer's  
27 protocol. The fold change in gene expression was determined using the *ddCt* method (5). Primer sequences are listed in  
28 Supplemental Table 4. Telomere lengths were measured using quantitative real time PCR as described previously (4).

## 1 **Flow Cytometry**

2 To determine the cell cycle profiles, CPCs were fixed in 70% ethanol and stained with propidium iodide (PI)/ RNase buffer  
3 (BD Biosciences, #550825) for 3 hours at 37°C, as described before (9,10). To determine Bromodeoxyuridine (BrdU)  
4 rates, mCPCs were treated with 10µM BrdU over a 24 hour time course and fixed in 70% ethanol (overnight, 4°C),  
5 denatured (2N HCl/0.2% Triton-X100 for 30 minutes), neutralized (0.1 mol/L TrisHCl pH 8.5 for 10 minutes), blocked (PBS  
6 supplemented with 10% horse serum for 30 minutes), incubated in primary (overnight, 4°C) and secondary antibodies  
7 (1:50, 1 hour at room temperature) and stained with PI/RNase buffer (3 hours, 37°C). For cell death assays, CPCs were  
8 stained with propidium iodide for 2 minutes (10). Live cells were sorted on FACSAria (BD Biosciences) to detect  
9 fluorescent protein expression. Data was processed using FlowJo software.

## 10 **Proliferation and Differentiation Assays**

11 CPCs were seeded in quadruplicates at a density of 1000 cells/well in a 96-well flat bottom culture plate. Proliferation  
12 rates were determined using Cyquant direct cell proliferation assay (Life Technologies, #C35011). To determine  
13 differentiation potential, mCPCs were cultured at a density of 10,000 cells/well in a 6 well plate over a 7 day period and  
14 were treated with either full media or  $\alpha$ -minimal essential media with 10% FBS, 1% penicillin streptomycin glutamine, in  
15 the presence and absence of dexamethasone (Dex, 10nM), following which protein lysates were extracted.

## 16 **Microscopy**

17 Senescent CPCs were detected using SA- $\beta$ -gal assay (Abcam #ab65351) on Olympus IX70 microscope.  
18 Immunofluorescent images of paraffin sections or cultured cells were acquired as described before on Leica SP2 or SP8  
19 confocal microscopes (3). For experiments with immunostaining and SA- $\beta$ -gal staining of cultured cells, SA- $\beta$ -gal assay  
20 was performed first followed by immunostaining (3). Phalloidin conjugate 633 and sytox blue (SB) were used to stain the  
21 actin filaments and nuclei respectively (5). Image processing of single channel scans to generate the overlaid image was  
22 done on Adobe Photoshop.

## 23 **Electron microscopy**

24 Cells were grown in hCPC media on glass cover slips placed in a 6-well plate. After 24 hours of culture, cells were  
25 transduced with lentiviruses following which coverslips were removed and rinsed before being fixed at room temperature  
26 with 1% glutaraldehyde in 0.1 M phosphate buffer (pH 7.2) for one hour. After fixation, cover slips were rinsed and  
27 samples were dehydrated at room temperature through a graded series of ethanol solutions (25%, 35%, 50%, 70%, 75%,  
28 85%, 95% and 100%). Samples were then dried using a Samdri-790 Critical Point Dryer and coated with 6-nm Platinum

(QT150 Sputter Coater). Scanning electron microscopy was performed on a FEI Quanta 450 FEG as described previously (11).

### **Evaluation of cell morphology**

Images of cultured CPCs were obtained on a Leica DMIL microscope and outlines were traced using ImageJ software. Parameters such as area, “shape descriptors” and “Feret’s diameter” were measured, based on which the cross sectional area and roundness were determined (4). Feret/MinFeret was used to evaluate length/width ratio of each cell.

### **Experimental Animals**

Transgenic mice harboring eGFP driven by the NS promoter (pNSeGFP) (12), cardiac specific overexpression of Pim-1 (Pim-1-WT) (13), global deletion of Pim-1 (Pim-1-KO) (13), and NS heterozygous knockout mice (NS+/-) (14) have been described before. Nontransgenic (NTg) mice were used as controls. Only males were used for adult NS+/- mice studies. Cardiac function determination using echocardiography analyses has been reported previously (3,6). Mice were euthanized by anoxia with 100% carbon-di-oxide, the heart was harvested and washed with cold PBS, both auricles and the right ventricle were separated from the left ventricle (LV) which was used for biochemical analyses. The base of the LV was used for protein, RNA and DNA analyses and the apex of the LV was fixed in formalin and processed for confocal microscopy analyses. All animal protocols and studies were approved by the review board of the Institutional Animal Care and Use Committee at San Diego State University.

### **Human studies**

Study was approved by the institutional review committees at San Diego State University and Temple University School of Medicine. Written informed consent was received from human patients prior to inclusion in this study.

### **Statistics**

All data are expressed as mean +/- SEM. Pearson correlation analyses and statistical analyses were done using paired or unpaired Student’s t-test, one way-ANOVA with Newman-Keuls multiple comparison test or using two way ANOVA with Bonferroni post-tests on Graph Pad Prism v5.0. A value of  $p < 0.05$  was considered statistically significant.

### **Figure Legends**

**Figure S1. Cellular flattening of CPCs. A-D.** Confocal microscopic image of AhCPCs at late passage (Line H10-001, p13) stained with phalloidin (green) and a nuclear stain, sytox blue (red) indicating a morphologically altered (white arrow) and unaltered cell (yellow arrow, **A.**) **B-C.** Z-stack images of the cells indicated by arrows demonstrating that the

1 morphological alteration of cell flattening is evident three dimensionally as thinner cells. Z-stack images have been shown  
2 to the bottom and right of the overlaid images. The white lines indicate the sectioning axes to visualize the Z-stack. **D.** 3-  
3 dimensional topographical view of the Z-stack with the colors indicating their thickness.

4 **Figure S2. Senescence characteristics of CPCs.** **A.** OCPCs have reduced proliferation rate relative to YCPCs as  
5 determined by Cyquant assay (N=4). **B.** OCPCs have increased G1, decreased S and G2 phase populations determined  
6 by DNA content measurements using FACS (N=5). **C.** Bi- and polynucleate OCPCs are predominantly SA- $\beta$ -gal+ as seen  
7 from percentage distribution of cells based on nuclei number and SA- $\beta$ -gal activity (N=1200 cells). **D.** Confocal  
8 microscopy of myocardial sections in 12 month (12mo) and 3 month old (3mo) mice stained for c-kit (green), nucleus  
9 (sytox blue (SB), white), senescence marker  $\gamma$ -H2AX (red) and sarcomeric actin (s-actin, blue). Insets **(a)** and **(b)** indicate  
10 higher magnification of overlaid image and selected single channel scans. Arrows point to CPC. **E.** 12 month old FVB  
11 mice (12mo) have more CPCs positive for senescence marker  $\gamma$ -H2AX than 3 month (3mo) old mice *in vivo*. **F.** More  
12 binucleate CPCs are observed with increasing age *in vivo*. **G.** Percentage distribution of cells based on nuclei number and  
13 expression of  $\gamma$ -H2AX (12 mo: N= 17 cells from 4 mice, 3 mo: N=17 cells from 3 mice). **H.** Cell autonomous role for  
14 diminished NS expression and binucleation is established from confocal microscopic image of cultured OCPCs stained  
15 with Phalloidin (Phal, grey), NS (red) and SB (blue). White arrows indicate binucleate cells with decreased NS. Red  
16 arrowheads indicate cells expressing NS. **I.** Confocal microscopic images of FhCPCs (line FH05) and AhCPC (H13-068)  
17 stained with Phal (grey), NS (red), SB (blue). Yellow and white arrows respectively indicate morphologically altered and  
18 binucleate AhCPCs with decreased NS. Scale bar indicates 50 $\mu$ m (D), 100 $\mu$ m (H,I). Human CPCs at mid passages were  
19 used.

20 **Figure S3. Loss of NS causes CPC senescence.** **A.** Morphometric analyses of relative cross sectional area (Rel.CSA),  
21 roundness and length/width ratio reveals that NS knockdown (Lt-sh-NS) causes cell flattening in AhCPCs (N>30 cells, 3  
22 experiments each). **B.** Morphological changes caused by NS knockdown are also evident by comparing forward scatter  
23 areas (FSC-A) from FACS analyses of YCPCs. **C-F.** YCPCs were transduced with transduced with indicated lentiviruses  
24 and stained with SA- $\beta$ -gal. **C.** Phase contrast microscopic images with representative binucleate (binuc.) and polynucleate  
25 (polynuc.) SA- $\beta$ -gal+ cells upon NS knockdown are shown in the lower panel **D.** Senescent cell counts. **E-F.** Percentage  
26 of multinucleate cells **(E)** and CPCs that are multinucleate and SA- $\beta$ -gal+ **(F)**. **(C-F:** N>1700 cells). Scale bar indicates  
27 100 $\mu$ m. \*p<0.05, \*\*p<0.01, \*\*\*p<0.001 (relative to each corresponding group in Lt-sh-control in **A, E**). The black and red  
28 lines and \* in **E** and **F**. indicate comparison between different mononucleate and binucleate groups respectively.

**Figure S4. Loss of NS inhibits proliferation and differentiation without affecting basal cell death of CPCs.** **A.** NS knockdown increases G1 and decreases S and G2 phases of the cell cycle, determined by DNA content measurements using FACS in YCPCs (N=6). **B.** NS is silenced in YCPCs expressing FUCCl reporter construct harboring Azami green-tagged Geminin (AzG). NS knockdown reduces the AzG+ cells indicative of decreased S-M phase as determined by FACS (N=4). **C.** NS knockdown upregulates senescence markers p53 and p16 in AhCPCs (Line H11-020) **D.** Loss of NS does not increase basal cell death as determined by representative FACS histograms (left) and mean percentage of dead cells (right) in YCPCs (N=7). **E.** NS silencing decreases the basal mRNA level of c-kit and lineage commitment markers SM-22,  $\alpha$ -smooth muscle actin ( $\alpha$ -SMA) and myocyte enhancement factor-2c (MEF2c) as seen by qRTPCR analyses in YCPCs. Dashed line indicates value of Lt-sh-control (N=3 for each gene). \* indicates  $p < 0.05$ , \*\* indicates  $p < 0.01$  vs Lt-sh-control. N.S not significant.

**Figure S5. Knockdown of p53 restores CPC morphology lost upon NS silencing.** **A-B.** Phase contrast micrographs of AhCPC (Line H10-005) and YCPCs with knockdown of p53 and/or NS. **C.** NS knockdown-induced loss of CPC morphology is prevented by p53 silencing as indicated by morphometric measurements of relative cross sectional area, length/width ratio and roundness in YCPCs (N>30 cells from 3 experiments). **D.** Silencing p53 and NS decreases SA- $\beta$ -gal+ mononucleate cells without affecting senescent multinucleate cells relative to sh-NS, as seen by percentage distribution of YCPCs based on nuclei number and SA- $\beta$ -gal+ activity (N=700 cells, 3 experiments). Scale bar indicates 100 $\mu$ m. \*\* indicates  $p < 0.01$ .

**Figure S6. Pim-1 regulates NS.** **A-B.** Pim-1 overexpression in AhCPC (hCPCeP) increases NS expression relative to AhCPC expressing eGFP (hCPCe), as demonstrated by immunoblot and densitometric analyses. Fast growing line H10-014 at mid (p5-7) and late passages (p10) was used (**A**). Slow growing line H10-004 fast at late passage (p10) was used (N=3). \* $p < 0.05$ , \*\* indicates  $p < 0.01$ , \*\*\*  $p < 0.001$ .

**Figure S7. Senescence markers in NS+/- mice.** Immunoblot and denistometric analyses show that NS heterozygous knockout mice (NS+/-) have increased cardiac p53 expression, but not p16, by 1 month of age relative to nontransgenic mice (NTg) (N=4 NTg, 4 NS+/-).

**Supplemental Table 1. M-mode echocardiography based functional analyses of NS+/- mice at different ages.** Key: NTg: Non-transgenic, NS+/-: mouse with heterozygous deletion of NS, (s): systole, (d): diastole, LVAW: left ventricular anterior wall, LVID: left ventricular inner diameter, LVPW: left ventricular posterior wall, EF: ejection fraction, FS: fractional shortening, LV vol: left ventricular volume. N indicates number of mice. Only male mice were used in the study. \*  $p < 0.05$  vs age-matched NTg.

1 **Supplemental Table 2. Patient information for human samples.** Key: W: Weeks, Y: Years, M: Male, F: Female, NYHA:  
2 New York Heart Association, EF%: Ejection Fraction, HyperLipid: Hyperlipidemia, N/Ap: Not Applicable (criteria not  
3 applicable), N/Av: Not Available (Patient information not available). For fetal and adult failing heart samples - C: CPCs  
4 obtained, H: Heart tissue used for biochemical analyses, C/H: both CPCs and heart tissue used. Patient information for  
5 many AhCPC lines used in the study has been recently published (4) and this table represents an update with inclusion of  
6 more samples.

7 **Supplemental Table 3. Antibody list.**

8 **Supplemental Table 4. Primer list.**

**Supplemental Table 1: M-mode echocardiography based functional analyses of NS+/- mice**

| Parameter         | Units | 1 month |        | 3 month |         | 6 month |         |
|-------------------|-------|---------|--------|---------|---------|---------|---------|
|                   |       | NTg     | NS+/-  | NTg     | NS+/-   | NTg     | NS+/-   |
| <b>LVAW (s)</b>   | mm    | 1.45    | 1.16   | 1.25    | 1.01 *  | 1.24    | 1.34    |
| <b>LVAW (d)</b>   | mm    | 1.05    | 0.76 * | 0.86    | 0.83    | 0.81    | 0.95 *  |
| <b>LVID (s)</b>   | mm    | 2.21    | 2.09   | 2.93    | 3.33 *  | 2.83    | 3.28 *  |
| <b>LVID (d)</b>   | mm    | 3.27    | 3.32   | 3.82    | 3.99    | 3.86    | 4.11    |
| <b>LVPW (s)</b>   | mm    | 1.31    | 1.21   | 0.97    | 0.9     | 1.16    | 0.86 *  |
| <b>LVPW (d)</b>   | mm    | 0.97    | 0.67   | 0.69    | 0.78    | 0.91    | 0.71    |
| <b>EF</b>         | %     | 61.85   | 67.5   | 46.64   | 32.37 * | 55.08   | 41.30 * |
| <b>FS</b>         | %     | 32.93   | 37.59  | 23.21   | 18.66   | 28.38   | 20.01 * |
| <b>LV Vol (s)</b> | μl    | 17.39   | 16.01  | 33.31   | 45.15 * | 31.22   | 43.7 *  |
| <b>LV Vol (d)</b> | μl    | 44.43   | 45.98  | 62.75   | 70.15   | 64.65   | 74.91   |
| <b>N</b>          |       | 4       | 3      | 6       | 5       | 6       | 5       |



**Supplemental Table 2: Patient Information for Human Samples**

| Sample ID     | Sample Type        | Age  | Sex  | NYHA                  | EF%          | Cardiac Index        | Diabetes | Hyper Lipid. | Smoking                   | Infarct                                       | Ischemia | Ace Inhibitor | β-Blocker | Anti-Coagulant |
|---------------|--------------------|------|------|-----------------------|--------------|----------------------|----------|--------------|---------------------------|-----------------------------------------------|----------|---------------|-----------|----------------|
| FH-01 (C)     | Fetal              | 16 w | F    | NOT APPLICABLE (N/Ap) |              |                      |          |              |                           |                                               |          |               |           |                |
| FH-03 (H)     |                    | 16 w |      |                       |              |                      |          |              |                           |                                               |          |               |           |                |
| FH-04 (H)     |                    | 16 w |      |                       |              |                      |          |              |                           |                                               |          |               |           |                |
| FH-05 (C/H)   |                    | 17 w | N/Av |                       |              |                      |          |              |                           |                                               |          |               |           |                |
| FH-08 (C/H)   |                    | 16 w |      |                       |              |                      |          |              |                           |                                               |          |               |           |                |
| H10-001 (C)   | Adult, Failing     | 68 Y | M    | IV                    | 11           | 1.6                  | Yes      | No           | No                        | No                                            | No       | Yes           | No        | Aspirin        |
| H10-004 (C)   |                    | 82 Y | M    | IV                    | 8            | 2                    | Yes      | Yes          | 1 pack/day for 30 Years   | Yes (Multiple)                                | Yes      | No            | No        | Aspirin        |
| H10-005 (C)   |                    | 52 Y | M    | IV                    | 20           | 1.3                  | Yes      | No           | No                        | Yes                                           | Yes      | Yes           | Yes       | Aspirin        |
| H10-014 (C)   |                    | 73 Y | M    | IV                    | 17           | 1.6                  | No       | No           | Yes, stopped 25 Years ago | Yes (Multiple with recent cardio-genic shock) | Yes      | No            | No        | Aspirin        |
| H11-020 (C)   |                    | 68 Y | M    | IV                    | 20           | 1.7                  | No       | No           | No                        | No                                            | No       | No            | No        | Aspirin        |
| H11-039 (H)   |                    | 65 Y | M    | NOT AVAILABLE (N/Av)  |              |                      |          |              |                           |                                               |          |               |           |                |
| H12-041 (H)   |                    | 59 Y | M    |                       |              |                      |          |              |                           |                                               |          |               |           |                |
| H12-043 (C)   |                    | 42 Y | M    | IV                    | 20           | 1.6                  | No       | No           | No                        | No                                            | No       | Yes           | Yes       | Aspirin        |
| H12-044 (H)   |                    | 81 Y | M    | IV                    | 14           | 1.47                 | Yes      | Yes          | Yes, stopped 29 Years ago | Yes (Multiple)                                | Yes      | No            | No        | Aspirin        |
| H12-045 (C/H) |                    | 75 Y | M    | IV                    | 19           | 2.4                  | No       | Yes          | No                        | Yes                                           | Yes      | No            | No        | Aspirin        |
| H12-046 (H)   |                    | 47 Y | M    | IV                    | 20           | 1.3                  | No       | No           | No                        | No                                            | No       | No            | No        | Aspirin        |
| H12-047 (C/H) |                    | 72 Y | M    | IV                    | 8            | 1.1                  | Yes      | No           | No                        | No                                            | No       | No            | No        | Aspirin        |
| H12-053 (C)   |                    | 61 Y | M    | IV                    | 15           | 1.75                 | Yes      | Yes          | No                        | Yes                                           | Yes      | Yes           | Yes       | Aspirin        |
| H13-061 (C)   |                    | 65 Y | M    | IV                    | 20           | 1.62                 | No       | Yes          | No                        | No                                            | No       | No            | Yes       | Aspirin        |
| H13-068 (C)   |                    | 62 Y | M    | III                   | 20           | 1.6                  | Yes      | Yes          | Yes, stopped 3 Years ago  | Yes                                           | Yes      | Yes           | Yes       | Aspirin        |
| AD NF 322     | Adult, Non-Failing | 75 Y | M    | N/Ap                  | Normal > 50% | NOT AVAILABLE (N/Av) |          |              |                           |                                               |          |               |           |                |
| AD NF 331     |                    | 57 Y | F    |                       |              |                      |          |              |                           |                                               |          |               |           |                |
| AD NF 365     |                    | 58 Y | F    |                       |              |                      |          |              |                           |                                               |          |               |           |                |
| AD NF 443     |                    | 72 Y | F    |                       |              |                      |          |              |                           |                                               |          |               |           |                |
| AD NF 446     |                    | 40 Y | M    |                       |              |                      |          |              |                           |                                               |          |               |           |                |
| AD NF 506     |                    | 76 Y | M    |                       |              |                      |          |              |                           |                                               |          |               |           |                |

**Supplemental Table 3: Antibody list**

| Antibody / Species raised          | Company           | Catalog             | Dilution     | Application |
|------------------------------------|-------------------|---------------------|--------------|-------------|
| NS / goat                          | R&D Systems       | AF1638              | 1:500, 1:100 | IB, IHC     |
| NS / rabbit                        | Santa Cruz        | sc-67012            | 1:500        | IB          |
| p53 / mouse                        | Abcam             | ab26                | 1:500        | IB          |
| p53 / rabbit                       | Santa Cruz        | sc-6243             | 1:1000       | IB          |
| p16 / mouse                        | Santa Cruz        | sc-55600<br>sc-1661 | 1:100        | IB          |
| c-kit / goat                       | R&D Systems       | AF1356              | 1:1000, 1:50 | IB, IHC     |
| c-Myc / mouse                      | Santa Cruz        | sc-42               | 1:500        | IB          |
| c-Myc / mouse                      | Zymed             |                     | 1:500        | IB          |
| c-Myc/ rabbit                      | Cell Signaling    | 5605                | 1.500        | IB          |
| Pim-1 / mouse                      | Zymed             | 394600              | 1:1000       | IB          |
| $\alpha$ -SMA / mouse              | Sigma             | A2547               | 1:1000       | IB          |
| $\alpha$ -Tubulin / rabbit         | Cell Signaling    | 2144                | 1:1000       | IB          |
| $\beta$ -actin / mouse             | Santa Cruz        | sc-81178            | 1:1000       | IB          |
| BrdU / rat                         | Novus Biologicals | NB500-169           | 1:100        | FACS        |
| Cyclin D1 / rabbit                 | Biosource         | AHF0102             | 1:500        | IB          |
| GAPDH / mouse                      | Millipore         | MAB374              | 1:1000       | IB          |
| GFP / goat                         | Rockland          | 600-101-215         | 1:500        | IB          |
| $\gamma$ -H2AX / rabbit            | Millipore         | MABE205             | 1:500        | IB          |
| $\alpha$ -Sarcomeric actin / mouse | Sigma             | A2172               | 1:100        | IHC         |
| Aurora B / rabbit                  | Zymed             | 365200              | 1:200        | IB          |
| Calsequestrin                      | Thermo Scientific | PA1-913             | 1:1000       | IB          |
| Oct 4/rabbit                       | Abcam             | Ab19857             | 1:500        | IB          |
| Nanog                              | Millipore         | AB5731              | 1:500        | IB          |
| KLF4/rabbit                        | Cell Signaling    | 4038                | 1:500        | IB          |

**Supplemental Table 4: Primer List**

| Primer Name   | Forward/Reverse | Sequence                |
|---------------|-----------------|-------------------------|
| c-kit         | Forward         | ATTGTGCTGGATGGATGGAT    |
|               | Reverse         | GATCTGCTCTGCGTCCTGTT    |
| SM22          | Forward         | GACTGCACTTCTCGGCTCAT    |
|               | Reverse         | CCGAAGCTACTCTCCTTCCA    |
| $\alpha$ -SMA | Forward         | GTTCAGTGGTGCCTCTGTCA    |
|               | Reverse         | ACTGGGACGACATGGAAAAG    |
| MEF2c         | Forward         | GCACAGCTCAGTTCCCAAAT    |
|               | Reverse         | TGGAGAGATGAAGTGAAGCG    |
| NS (mouse)    | Forward         | GGGAGCTGTACCTGAGCAA     |
|               | Reverse         | CATCCTCTTGACTCGCTCTATCC |
| NS (human)    | Forward         | GGGAAGATAACCAAGCGTGTG   |
|               | Reverse         | CCTCCAAGAAGTTTCCAAAGG   |
| 18S           | Forward         | CGAGCCGCCTGGATACC       |
|               | Reverse         | CATGGCCTCAGTTCCGAAAA    |

## References

1. Cottage CT, Neidig L, Sundararaman B et al. Increased mitotic rate coincident with transient telomere lengthening resulting from pim-1 overexpression in cardiac progenitor cells. *Stem Cells* 2012;30:2512-22.
2. Fischer KM, Cottage CT, Wu W et al. Enhancement of myocardial regeneration through genetic engineering of cardiac progenitor cells expressing Pim-1 kinase. *Circulation* 2009;120:2077-87.
3. Mohsin S, Khan M, Toko H et al. Human cardiac progenitor cells engineered with Pim-I kinase enhance myocardial repair. *J Am Coll Cardiol* 2012;60:1278-87.
4. Mohsin S, Khan M, Nguyen J et al. Rejuvenation of human cardiac progenitor cells with Pim-1 kinase. *Circ Res* 2013;113:1169-79.
5. Avitabile D, Bailey B, Cottage CT et al. Nucleolar stress is an early response to myocardial damage involving nucleolar proteins nucleostemin and nucleophosmin. *Proc Natl Acad Sci U S A* 2011;108:6145-50.
6. Khan M, Mohsin S, Avitabile D et al. beta-Adrenergic regulation of cardiac progenitor cell death versus survival and proliferation. *Circ Res* 2013;112:476-86.
7. Cottage CT, Bailey B, Fischer KM et al. Cardiac progenitor cell cycling stimulated by pim-1 kinase. *Circ Res* 2010;106:891-901.
8. Dipla K, Mattiello JA, Jeevanandam V, Houser SR, Margulies KB. Myocyte recovery after mechanical circulatory support in humans with end-stage heart failure. *Circulation* 1998;97:2316-22.
9. Sundararaman B, Avitabile D, Konstandin MH, Cottage CT, Gude N, Sussman MA. Asymmetric chromatid segregation in cardiac progenitor cells is enhanced by Pim-1 kinase. *Circ Res* 2012;110:1169-73.
10. Toko H, Hariharan N, Konstandin MH et al. Differential regulation of cellular senescence and differentiation by prolyl isomerase pin1 in cardiac progenitor cells. *J Biol Chem* 2014;289:5348-56.
11. Din S, Konstandin MH, Johnson B et al. Metabolic Dysfunction Consistent with Premature Aging Results from Deletion of Pim Kinases. *Circ Res* 2014.
12. Ohmura M, Naka K, Hoshii T et al. Identification of stem cells during prepubertal spermatogenesis via monitoring of nucleostemin promoter activity. *Stem Cells* 2008;26:3237-46.
13. Muraski JA, Rota M, Misao Y et al. Pim-1 regulates cardiomyocyte survival downstream of Akt. *Nat Med* 2007;13:1467-75.
14. Qu J, Bishop JM. Nucleostemin maintains self-renewal of embryonic stem cells and promotes reprogramming of somatic cells to pluripotency. *J Cell Biol* 2012;197:731-45.
